# Supplementary material
Source: PubMed Central journal article supplement (PMC9530021)

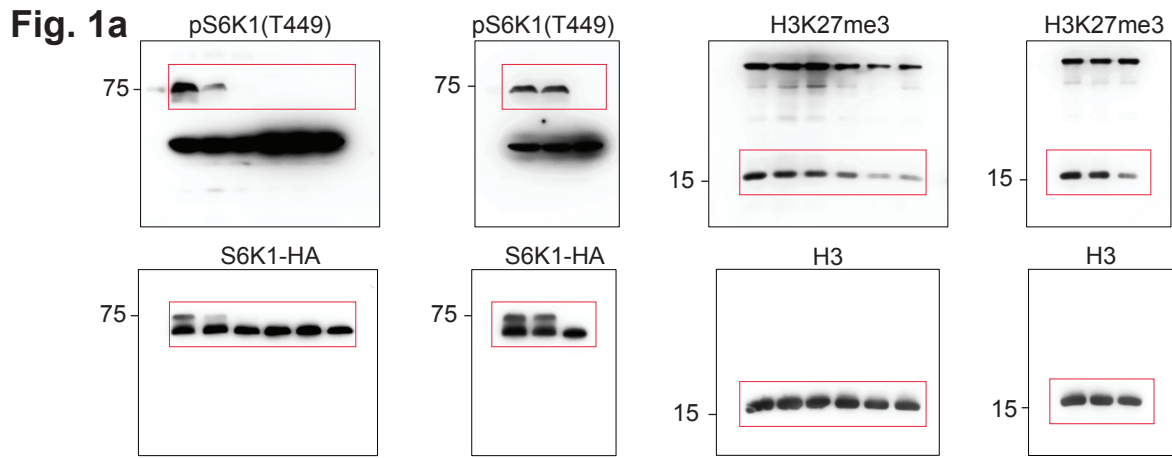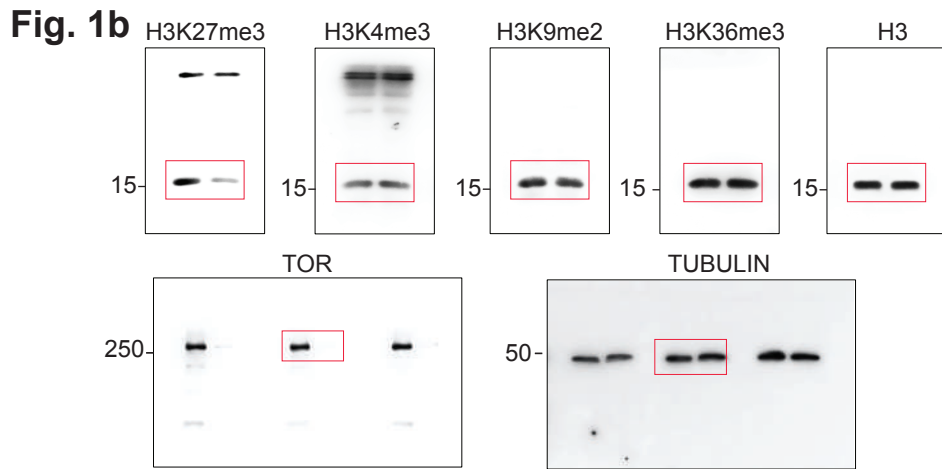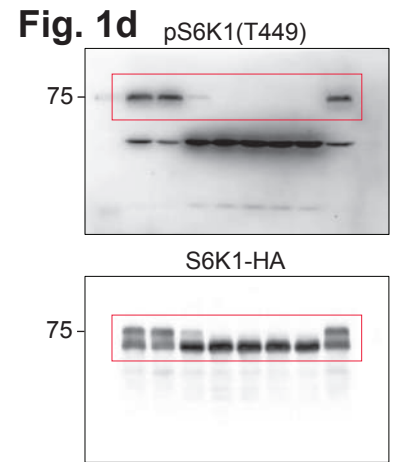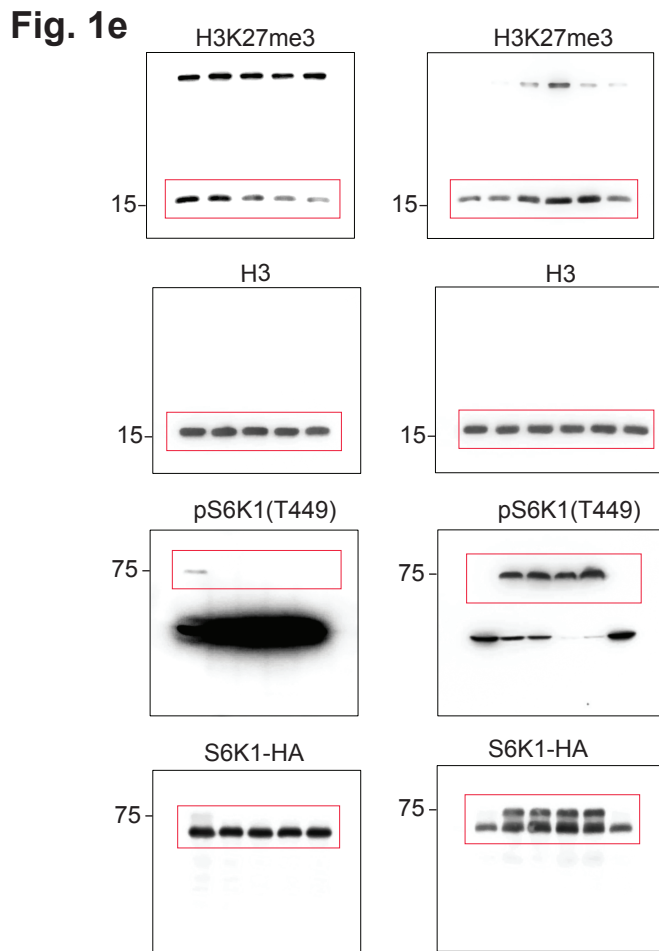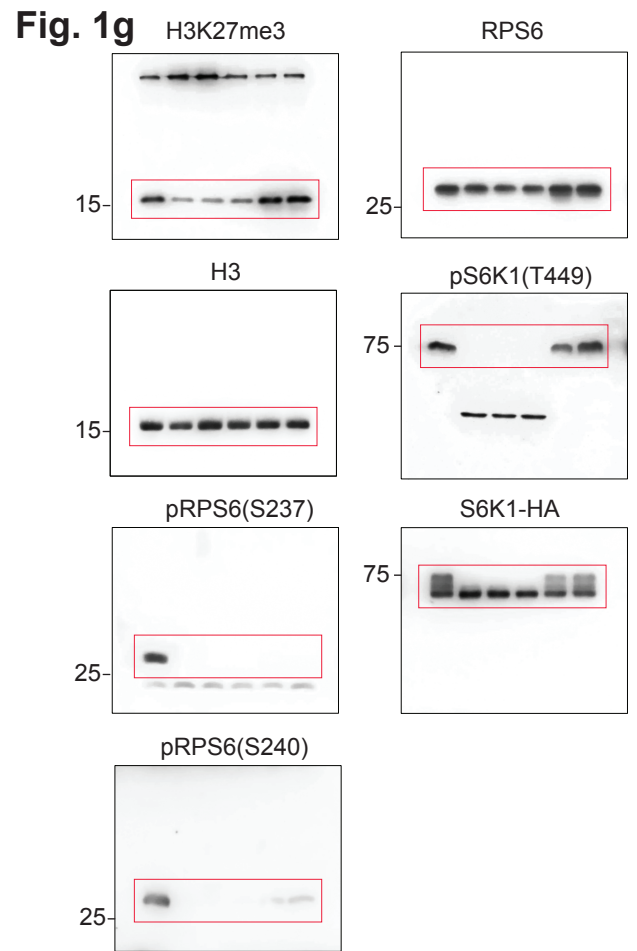

**Fig. 2b**

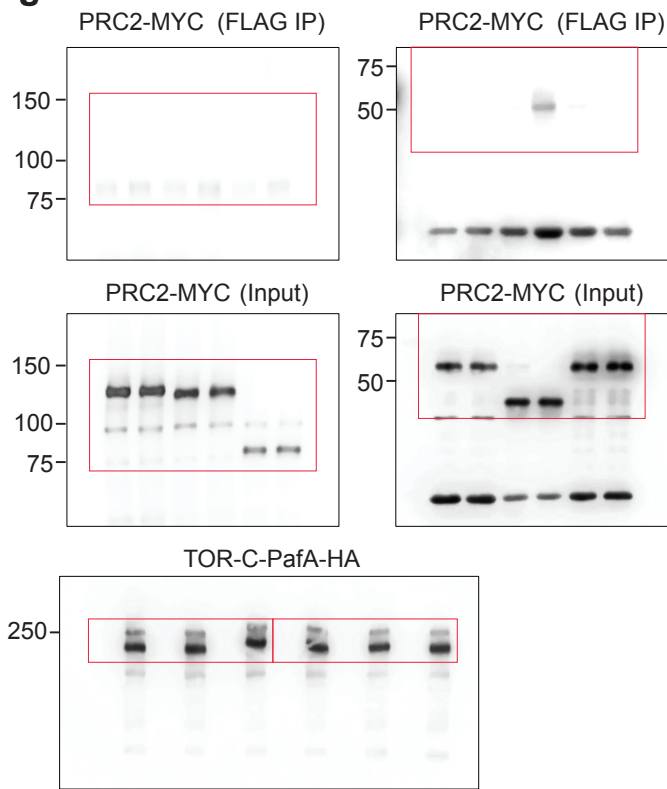

**Fig. 2c**

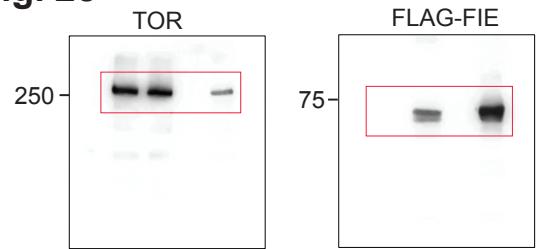

**Fig. 2d, f**

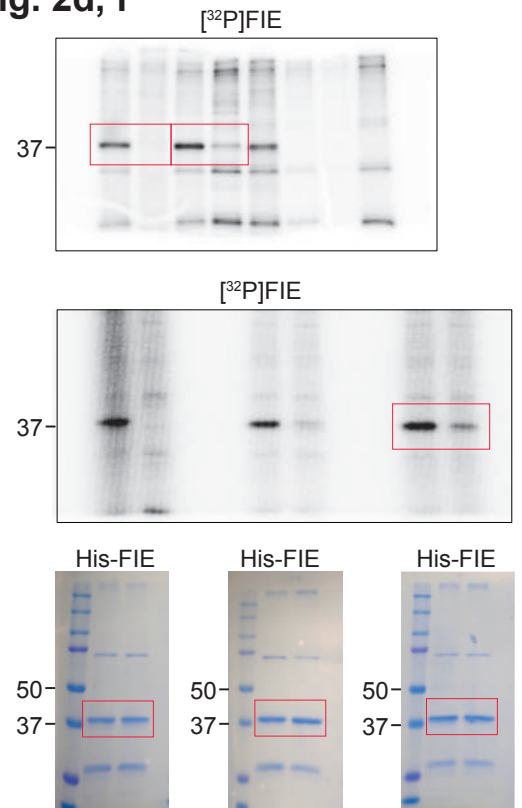

**Fig. 2g**

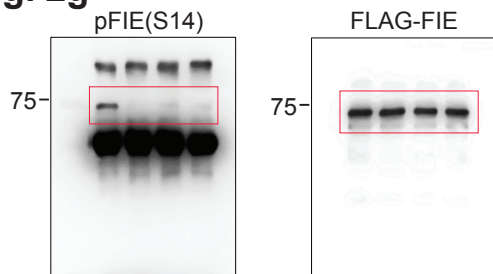

**Fig. 2h**

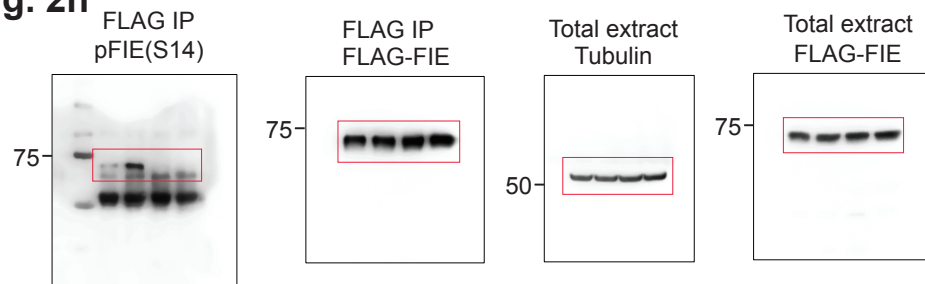

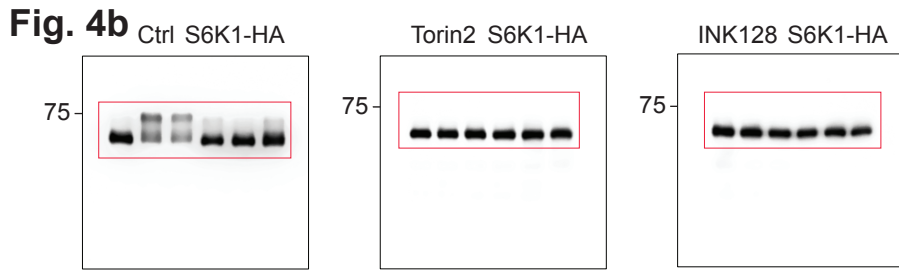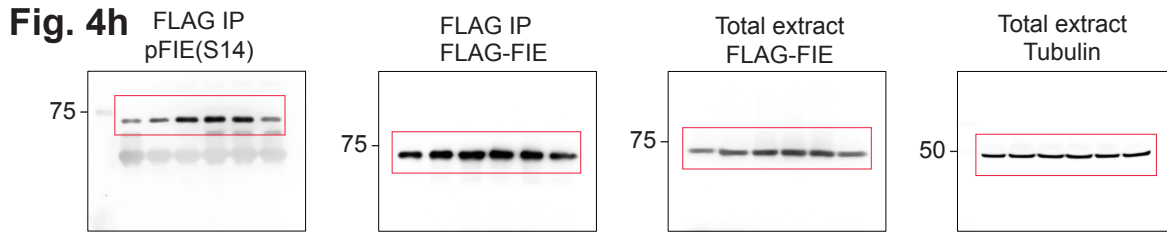

**Extended Data Fig. 1e**

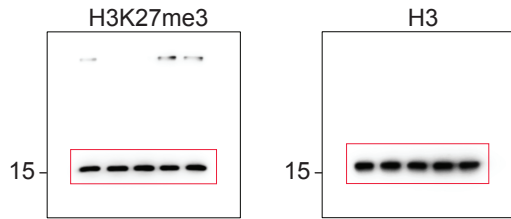

**Extended Data Fig. 2a**

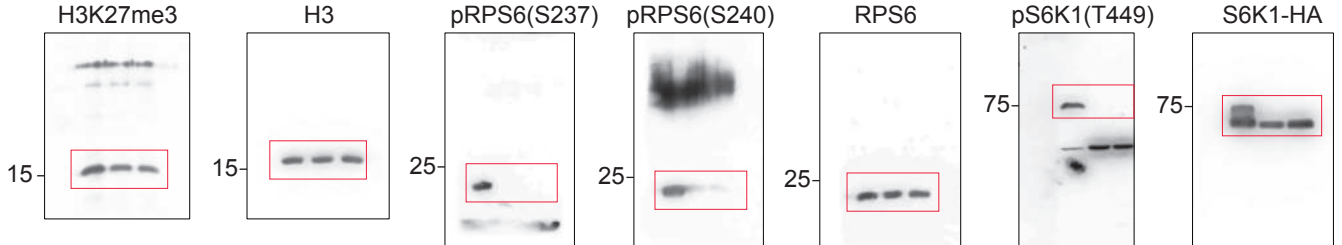

**Extended Data Fig. 2e**

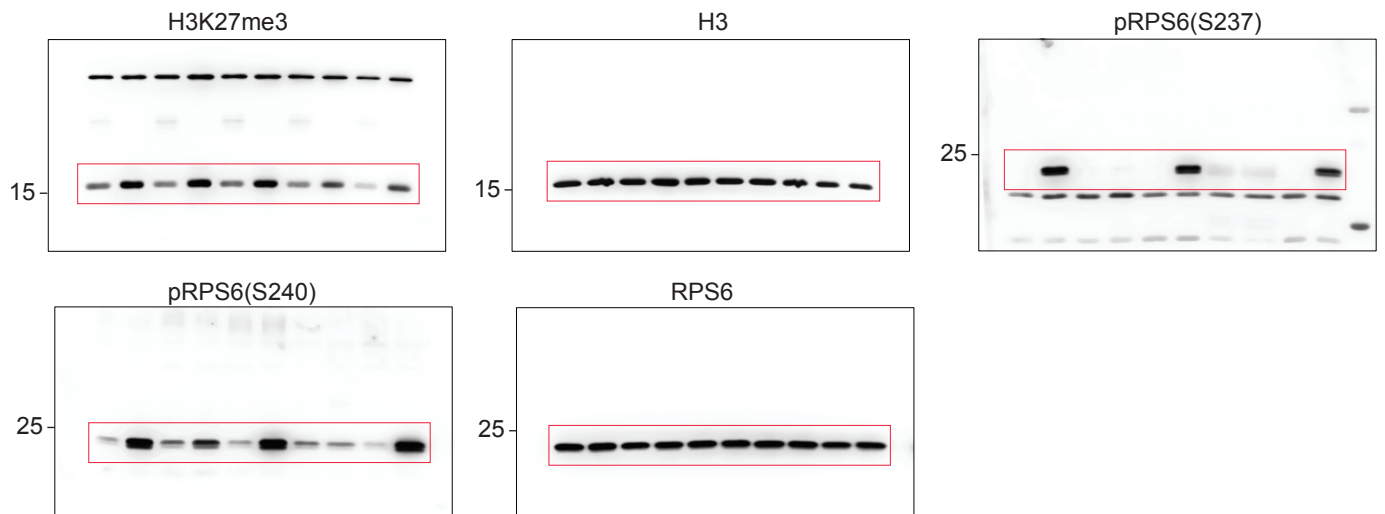

### Extended Data Fig. 3c

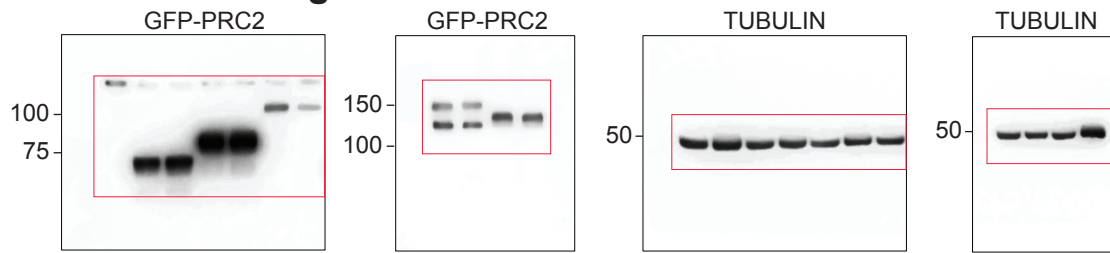

### Extended Data Fig. 4a

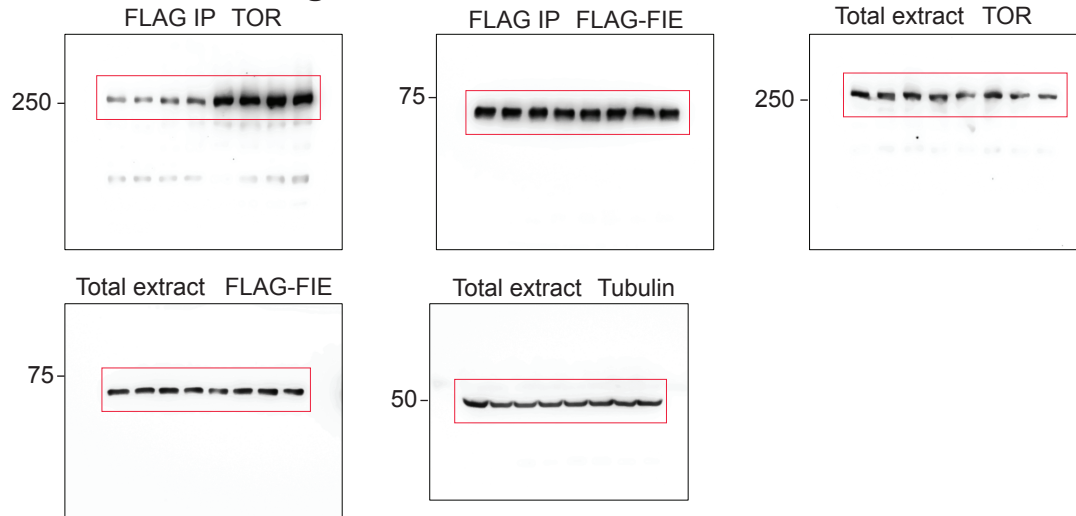

### Extended Data Fig. 4h

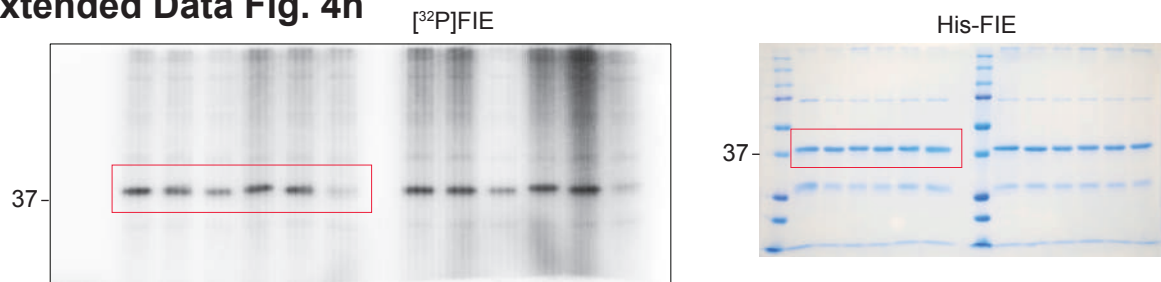

### Extended Data Fig. 5c

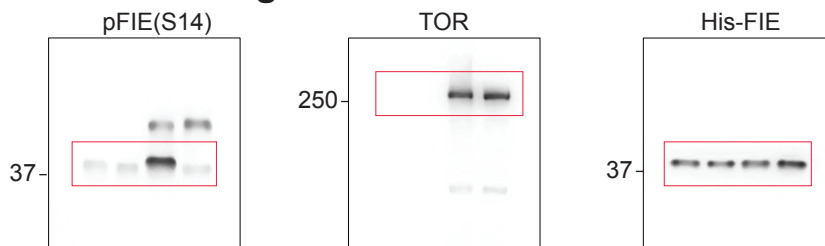

### Extended Data Fig. 5d

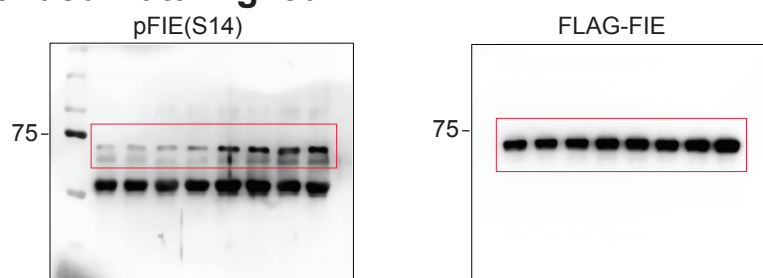



### Extended Data Fig. 5e

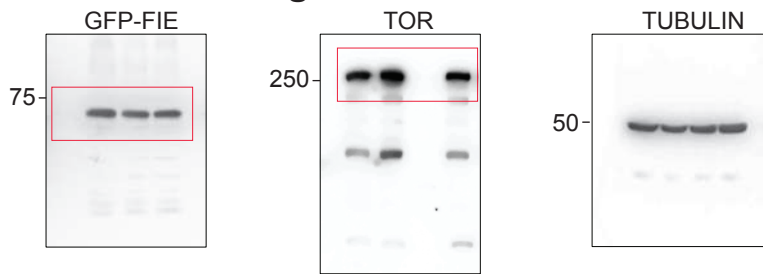

### Extended Data Fig. 5f

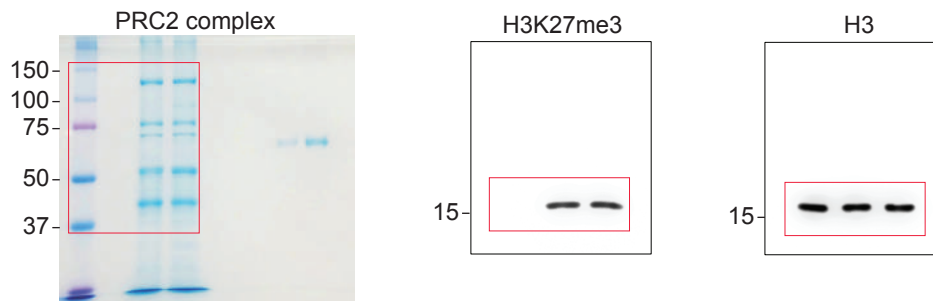

### Extended Data Fig. 6e

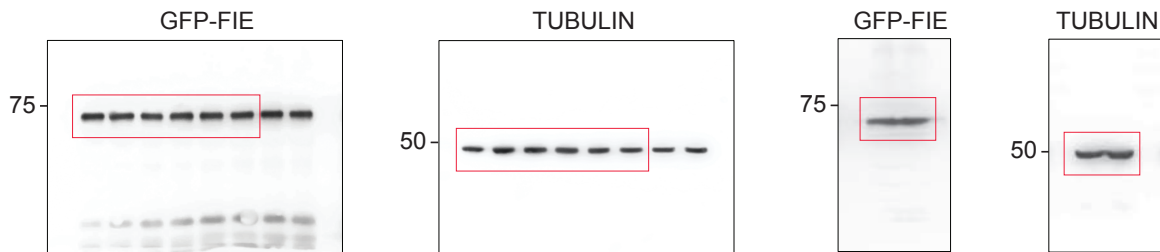

### Extended Data Fig. 7a

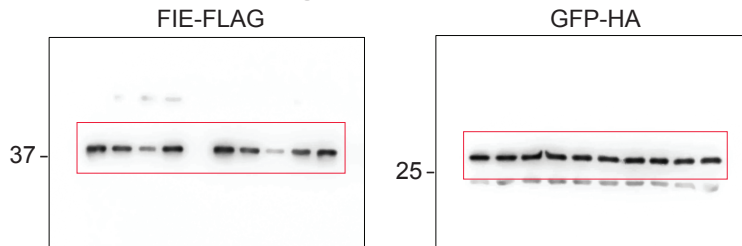

### Extended Data Fig. 7c

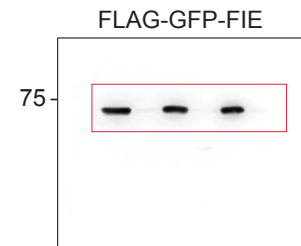

### Extended Data Fig. 7e

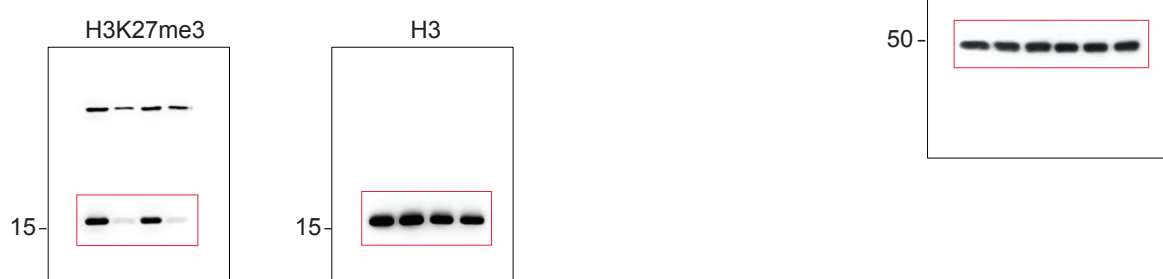

Supplement: NIHMS1833626-supplement-1833626_Sup_Fig_1.pdf [file NIHMS1833626-supplement-1833626_Sup_Fig_1.pdf]
